# Supplementary material for: Comparative evaluation of the health utilities index mark 3 and the short form 6D: evidence from an individual participant data meta-analysis of very preterm and very low birthweight adults
Source: Springer Nature journal article supplement (doi:10.1007/s11136-023-03344-x), 2023-01-27
Supplement: MOESM1 [file 23963038]

## **A Additional Evidence on VP/VLBW Association Across HUI3 and SF-6D Instruments**

Table A.1: One-stage IPD Meta-analyses for HUI3 Single-Attribute Utility Scores Comparing VP/VLBW with Control Groups. Method: Linear Fixed Effects Models.

| HUI3 Outcomes                       | Undjusted Model  |      |              |              |                 | Adjusted Model   |      |              |              |                 |
|-------------------------------------|------------------|------|--------------|--------------|-----------------|------------------|------|--------------|--------------|-----------------|
|                                     | $\beta_{VP/VPT}$ | SE   | Lower 95% CI | Upper 95% CI | <i>p</i> -value | $\beta_{VP/VPT}$ | SE   | Lower 95% CI | Upper 95% CI | <i>p</i> -value |
| HUI3-Vision Optimal Functioning     | -0.09            | 0.03 | -0.16        | -0.02        | 0.01            | -0.15            | 0.04 | -0.22        | -0.07        | <0.001          |
| HUI3-Vision SAU score               | -0.01            | 0.00 | -0.01        | -0.00        | <0.001          | -0.01            | 0.00 | -0.01        | -0.00        | 0.01            |
| HUI3-Hearing Optimal Functioning    | -0.01            | 0.01 | -0.03        | 0.01         | 0.46            | -0.00            | 0.01 | -0.02        | 0.02         | 0.81            |
| HUI3-Hearing SAU score              | -0.00            | 0.00 | -0.00        | 0.00         | 0.79            | 0.00             | 0.00 | -0.00        | 0.00         | 0.80            |
| HUI3-Speech Optimal Functioning     | -0.04            | 0.02 | -0.09        | 0.00         | 0.06            | -0.03            | 0.03 | -0.08        | 0.02         | 0.19            |
| HUI3-Speech SAU score               | -0.00            | 0.00 | -0.01        | 0.00         | 0.05            | -0.00            | 0.00 | -0.01        | 0.00         | 0.17            |
| HUI3-Emotion Optimal Functioning    | -0.06            | 0.03 | -0.13        | 0.00         | 0.06            | -0.08            | 0.04 | -0.15        | -0.00        | 0.04            |
| HUI3-Emotion SAU score              | -0.01            | 0.00 | -0.01        | 0.00         | 0.08            | -0.01            | 0.00 | -0.01        | 0.00         | 0.15            |
| HUI3-Pain Optimal Functioning       | 0.06             | 0.03 | -0.01        | 0.12         | 0.07            | 0.04             | 0.04 | -0.03        | 0.12         | 0.25            |
| HUI3-Pain SAU score                 | 0.00             | 0.00 | -0.00        | 0.01         | 0.32            | 0.00             | 0.00 | -0.00        | 0.01         | 0.30            |
| HUI3-Ambulation Optimal Functioning | -0.03            | 0.01 | -0.06        | -0.01        | <0.001          | -0.04            | 0.01 | -0.06        | -0.02        | <0.001          |
| HUI3-Ambulation SAU score           | -0.01            | 0.00 | -0.02        | -0.00        | <0.001          | -0.01            | 0.00 | -0.02        | -0.00        | <0.001          |
| HUI3-Dexterity Optimal Functioning  | -0.05            | 0.01 | -0.07        | -0.03        | <0.001          | -0.06            | 0.01 | -0.08        | -0.03        | <0.001          |
| HUI3-Dexterity SAU score            | -0.01            | 0.00 | -0.01        | -0.00        | 0.00            | -0.01            | 0.00 | -0.01        | -0.00        | <0.001          |
| HUI3-Cognitive Functioning          | -0.08            | 0.03 | -0.15        | -0.02        | 0.01            | -0.08            | 0.04 | -0.15        | -0.01        | 0.03            |
| HUI3-Cognitive SAU score            | -0.01            | 0.00 | -0.02        | 0.00         | 0.06            | -0.01            | 0.01 | -0.02        | -0.00        | 0.05            |

Notes: Adjusted models controlled for: sex, maternal education, age at assessment and cohorts as fixed factors. Mat Educ - maternal education. SE – Robust Standard Error. CI - confidence interval. SAU – Single Attribute Utility Score.

Table A.2: One-stage IPD Meta-analyses for SF-6D Single-Attribute Utility Scores Comparing VP/VLBW with Control Groups. Method: Linear Fixed Effects Models.

| SF-6D Outcomes                             | Undjusted Model   |      |              |              |                 | Adjusted Model    |      |              |              |                 |
|--------------------------------------------|-------------------|------|--------------|--------------|-----------------|-------------------|------|--------------|--------------|-----------------|
|                                            | $\beta_{VP/VLBW}$ | SE   | Lower 95% CI | Upper 95% CI | <i>p</i> -value | $\beta_{VP/VLBW}$ | SE   | Lower 95% CI | Upper 95% CI | <i>p</i> -value |
| SF-6D Physical Optimal Functioning         | -0.07             | 0.02 | -0.11        | -0.03        | 0.00            | -0.06             | 0.02 | -0.11        | -0.02        | 0.01            |
| SF-12 Physical Functioning score           | -4.79             | 1.35 | -7.44        | -2.13        | 0.00            | -4.78             | 1.56 | -7.86        | -1.71        | <0.001          |
| SF-6D Role Limitations Optimal Functioning | -0.04             | 0.03 | -0.10        | 0.01         | 0.13            | -0.05             | 0.03 | -0.11        | 0.01         | 0.10            |
| SF-12 Role Limitations score               | -1.37             | 1.73 | -4.77        | 2.04         | 0.43            | 0.67              | 1.92 | -3.10        | 4.43         | 0.73            |
| SF-6D Social Optimal Functioning           | -0.02             | 0.03 | -0.09        | 0.04         | 0.50            | -0.05             | 0.04 | -0.12        | 0.02         | 0.18            |
| SF-12 Social Functioning score             | -3.46             | 1.49 | -6.37        | -0.54        | 0.02            | -4.13             | 1.54 | -7.15        | -1.10        | 0.01            |
| SF-6D Pain Optimal Functioning             | 0.01              | 0.03 | -0.04        | 0.07         | 0.66            | 0.00              | 0.03 | -0.06        | 0.06         | 0.97            |
| SF-12 Pain Functioning score               | -0.50             | 1.09 | -2.64        | 1.64         | 0.65            | -0.69             | 1.22 | -3.08        | 1.70         | 0.57            |
| SF-6D Mental Health Optimal Functioning    | 0.04              | 0.03 | -0.03        | 0.11         | 0.25            | 0.03              | 0.04 | -0.05        | 0.10         | 0.46            |
| SF-12 Mental Health score                  | -0.94             | 1.29 | -3.48        | 1.60         | 0.47            | -0.88             | 1.43 | -3.69        | 1.93         | 0.54            |
| SF-6D Vitality Optimal Functioning         | 0.06              | 0.02 | 0.02         | 0.10         | 0.00            | 0.04              | 0.02 | -0.01        | 0.09         | 0.08            |
| SF-12 Vitality score                       | -0.53             | 1.64 | -3.74        | 2.68         | 0.75            | -1.53             | 1.82 | -5.10        | 2.04         | 0.40            |
| SF-12 General Health score                 | -2.11             | 1.56 | -5.18        | 0.96         | 0.18            | -2.44             | 1.70 | -5.77        | 0.90         | 0.15            |
| SF-12 Role Emotional score                 | -2.28             | 2.12 | -6.43        | 1.88         | 0.28            | -2.81             | 2.17 | -7.08        | 1.45         | 0.20            |

*Notes:* Adjusted models controlled for: sex, maternal education, age at assessment and cohorts as fixed effects. SE – Robust Standard Error. CI - confidence interval.

Results from the one-stage meta-analysis presented in Table A.1 demonstrate that VP/VLBW status was associated with sub-optimal levels of function and lower SAU scores for the following HUI3 attributes: vision, emotion, ambulation, dexterity and cognition. Analogous estimates for the SF-6D meta-cohort are presented in Table A.2. Within the SF-6D cohort, VP/VLBW status was associated with sub-optimal physical functioning and with lower scores for the following SF-6D dimensions: physical and social functioning.

## **B One-stage IPD Meta-analysis: Random Effects Models**

Table B.1: One-stage IPD meta-analyses: Adjusted Impact of Preterm Birth on HUI3-MAU Score and SF-6D-MAU Score all Cohorts Combined. Method: Random Effects Models.

| <b>Outcome</b>  | $\beta_{VPT/VLBW}$ | <b>SE</b> | <b>Lower 95%CI</b> | <b>Upper 95%CI</b> | <b>p-value</b> |
|-----------------|--------------------|-----------|--------------------|--------------------|----------------|
| HUI3 MAU score  | -0.03              | 0.03      | -0.09              | 0.02               | 0.09           |
| SF-6D MAU score | -0.02              | 0.02      | -0.06              | 0.01               | 0.20           |

*Notes:* All models controlled for cohorts' random effects. Results are adjusted for: Mode of Delivery is an indicator for Cesarean section. Hosp. Days - number of days in hospital after birth. SE – Robust standard error. CI - confidence interval.
